# Supplementary material for: An SMS-Guided Basal Insulin Titration in People with Type 2 Diabetes New on Insulin
Source: PubMed Central journal article supplement — Diabetes Ther. 2024 Sep 30;15(11):2429–41. doi: 10.1007/s13300-024-01650-2 (PMC11466967; doi:10.1007/s13300-024-01650-2), 2024-09-30
Supplement: 13300_2024_1650_MOESM1_ESM.pdf [file 13300_2024_1650_MOESM1_ESM.pdf]

# **An SMS guided basal insulin titration in people with type 2 diabetes new on Insulin**

**Tim Snel <sup>1\*</sup>, Sven Reinhardt <sup>2</sup>, Helena Koenig<sup>2</sup>, Stefan Pleus <sup>3</sup>, and Guido Freckmann <sup>3</sup>**

<sup>1</sup> Roche Diabetes Care Nederland B.V.

<sup>2</sup> Roche Diabetes Care GmbH

<sup>3</sup> Institut für Diabetes-Technologie Forschungs-und  
Entwicklungsgesellschaft mbH an der Universität Ulm, D-89081  
Ulm, Germany

\* Correspondence: [tim.snel@roche.com](mailto:tim.snel@roche.com)

Supplementary Table 1 Diabetes Distress Scale (DDS)

| Parameter                        | Statistic   | Baseline Total<br>N=29 | Visit 4 Total N=29 | Change Total<br>N=29 |
|----------------------------------|-------------|------------------------|--------------------|----------------------|
| Composite score                  | N (missing) | 26 (3)                 | 25 (4)             | 24 (5)               |
|                                  | Mean (SD)   | 1.88 (0.82)            | 1.56 (0.50)        | -0.22 (0.50)         |
|                                  | [CI]        | [1.55 – 2.21]          | [1.35 – 1.76]      | [-0.43 - -0.01]      |
|                                  | Median      | 1.65                   | 1.35               | -0.18                |
|                                  | Q1 – Q3     | 1.24 – 2.18            | 1.18 – 1.82        | -0.32 – 0.06         |
|                                  | Min - Max   | 1.00 – 4.18            | 1.00 – 2.82        | -1.47 – 0.82         |
| Emotional burden score           | N (missing) | 28 (1)                 | 27 (2)             | 27 (2)               |
|                                  | Mean (SD)   | 2.25 (1.22)            | 2.00 (1.01)        | -0.24 (0.61)         |
|                                  | [CI]        | [1.78 – 2.72]          | [1.60 – 2.40]      | [-0.43 – 0.00]       |
|                                  | Median      | 2.20                   | 1.80               | -0.20                |
|                                  | Q1 – Q3     | 1.40 – 2.70            | 1.20 – 2.80        | -0.40 – 0.00         |
|                                  | Min - Max   | 1.0 – 6.0              | 1.0 – 4.6          | -1.6 – 1.2           |
| Physician-related distress score | N (missing) | 27 (2)                 | 26 (3)             | 25 (4)               |
|                                  | Mean (SD)   | 1.34 (0.96)            | 1.04 (0.09)        | -0.16 (0.50)         |
|                                  | [CI]        | [0.96 - 1.72]          | [1.00 - 1.08]      | [-0.37 - 0.05]       |
|                                  | Median      | 1.00                   | 1.00               | 0.00                 |
|                                  | Q1 – Q3     | 1.00 - 1.25            | 1.00 - 1.00        | 0.00 - 0.00          |
|                                  | Min - Max   | 1.00 - 5.50            | 1.00 - 1.25        | -2.25 - 0.25         |
| Regimen-related distress score   | N (missing) | 26 (3)                 | 27 (2)             | 25 (4)               |
|                                  | Mean (SD)   | 2.32 (1.28)            | 1.83 (0.86)        | -0.55 (1.30)         |
|                                  | [CI]        | [1.80 – 2.83]          | [1.49 – 2.17]      | [-1.09 - -0.01]      |
|                                  | Median      | 2.00                   | 1.60               | -0.20                |
|                                  | Q1 – Q3     | 1.40 – 2.80            | 1.00 – 2.20        | -0.80 – 0.00         |
|                                  | Min - Max   | 1.0 – 5.6              | 1.0 – 4.6          | -4.0 – 1.6           |
| Interpersonal distress score     | N (missing) | 28 (1)                 | 26 (3)             | 26 (3)               |
|                                  | Mean (SD)   | 1.76 (1.11)            | 1.41 (0.60)        | -0.18 (0.59)         |
|                                  | [CI]        | [1.33 – 2.19]          | [1.17 – 1.65]      | [-0.42 – 0.06]       |
|                                  | Median      | 1.33                   | 1.00               | 0.00                 |
|                                  | Q1 – Q3     | 1.00 – 2.00            | 1.00 – 1.67        | -0.33 – 0.00         |
|                                  | Min - Max   | 1.00 – 6.00            | 1.00 – 3.00        | -2.33 – 1.00         |

Supplementary Table 2 Hospital Anxiety and Depression Scale (HADS)

| Parameter        | Statistic   | Baseline Total<br>N=29 | Visit 4 Total N=29 | Change Total<br>N=29 |
|------------------|-------------|------------------------|--------------------|----------------------|
| Anxiety score    | N (missing) | 27 (2)                 | 28 (1)             | 27 (2)               |
|                  | Mean (SD)   | 5.9 (3.8)              | 5.0 (4.3)          | -0.7 (2.6)           |
|                  | [CI]        | [4.4 – 7.4]            | [3.4 – 6.7]        | [-1.7 – 0.3]         |
|                  | Median      | 6.0                    | 4.0                | 0.0                  |
|                  | Q1 – Q3     | 2.0 – 10.0             | 2.0 – 8.5          | -2.0 – 1.0           |
|                  | Min - Max   | 0 – 12                 | 0 – 16             | -7 – 5               |
| Depression score | N (missing) | 28 (1)                 | 28 (1)             | 28 (1)               |
|                  | Mean (SD)   | 5.2 (4.1)              | 5.1 (4.6)          | -0.1 (3.4)           |
|                  | [CI]        | [3.7 – 6.8]            | [3.3 – 6.9]        | [-1.5 – 1.2]         |
|                  | Median      | 4.0                    | 4.0                | 0.0                  |
|                  | Q1 – Q3     | 2.0 – 7.5              | 1.0 – 8.0          | -2.5 – 2.0           |

|           |        |        |        |
|-----------|--------|--------|--------|
| Min – Max | 0 – 16 | 0 – 15 | -8 - 9 |
|-----------|--------|--------|--------|

Supplementary Table 3 Diabetes Medication System Rating Questionnaire (DMSRQ)

| Parameter                            | Statistic   | Baseline Total<br>N=29 | Visit 4 Total N=29 | Change Total<br>N=29 |
|--------------------------------------|-------------|------------------------|--------------------|----------------------|
| Convenience satisfaction (two items) | N (missing) | 27 (2)                 | 25 (4)             | 24 (5)               |
|                                      | Mean (SD)   | 77.81 (26.18)          | 76.00 (26.87)      | -2.12 (27.49)        |
|                                      | [CI]        | [ 67.46 - 88.17]       | [ 64.91 - 87.09]   | [ -13.73 - 9.48]     |
|                                      | Median      | 83.50                  | 83.50              | 0.00                 |
|                                      | Q1 – Q3     | 66.50 – 100.00         | 50.00 – 100.00     | -25.00 – 16.50       |
|                                      | Min - Max   | 0.0 – 100.00           | 33.0 – 100.0       | -50.0 – 33.5         |
| Negative events (six items)          | N (missing) | 26 (3)                 | 25 (4)             | 23 (6)               |
|                                      | Mean (SD)   | 15.22 (17.04)          | 15.00 (16.00)      | 2.36 (15.83)         |
|                                      | [CI]        | [8.34 – 22.11]         | [8.39 – 21.61]     | [-4.49 – 9.20]       |
|                                      | Median      | 8.33                   | 12.50              | 0.00                 |
|                                      | Q1 – Q3     | 0.00 – 25.00           | 0.00 – 20.83       | 0.00 – 12.50         |
|                                      | Min - Max   | 0.00 - 54.17           | 0.00 – 54.17       | -33.33 – 33.33       |
| Interference (one item)              | N (missing) | 27 (2)                 | 19 (10)            | 18 (11)              |
|                                      | Mean (SD)   | 23.5 (39.1)            | 24.6 (33.1)        | -5.6 (17.1)          |
|                                      | [CI]        | [8.0 – 38.9]           | [8.6 – 40.5]       | [-14.0 – 2.9]        |
|                                      | Median      | 0.0                    | 0.0                | 0.0                  |
|                                      | Q1 – Q3     | 0.0 – 67.0             | 0.0 – 67.0         | 0.0 – 0.0            |
|                                      | Min - Max   | 0 – 100                | 0 – 100            | -34 – 33             |
| SMBG burden (one item)               | N (missing) | 25 (4)                 | 24 (5)             | 22 (7)               |
|                                      | Mean (SD)   | 24.0 (32.7)            | 4.2 (14.1)         | -18.2 (29.1)         |
|                                      | [CI]        | [10.5 – 37.5]          | [-1.8 – 10.1]      | [-31.1 - -5.2]       |
|                                      | Median      | 0.0                    | 0.0                | 0.0                  |
|                                      | Q1 – Q3     | 0.0 – 50.0             | 0.0 – 0.0          | -50.0 – 0.0          |
|                                      | Min - Max   | 0 – 100                | 0 – 50             | -100 - 0             |
| Efficacy (three items)               | N (missing) | 23 (6)                 | 22 (7)             | 20 (9)               |
|                                      | Mean (SD)   | 43.12 (22.42)          | 59.85 (24.31)      | 15.21 (30.39)        |
|                                      | [CI]        | [33.42 – 52.81]        | [49.07 – 70.63]    | [0.99 – 29.43]       |
|                                      | Median      | 41.67                  | 62.50              | 16.67                |
|                                      | Q1 – Q3     | 25.00 – 58.33          | 41.67 – 75.00      | 4.17 – 33.33         |
|                                      | Min - Max   | 0.00 – 100.00          | 8.33 – 100.00      | -83.33 – 50.00       |
| Social burden (one item)             | N (missing) | 28 (1)                 | 27 (2)             | 27 (2)               |
|                                      | Mean (SD)   | 9.8 (18.4)             | 3.7 (11.4)         | -6.5 (19.1)          |
|                                      | [CI]        | [2.7 – 17.0]           | [-0.8 – 8.2]       | [-14.0 – 1.1]        |
|                                      | Median      | 0.0                    | 0.0                | 0.0                  |
|                                      | Q1 – Q3     | 0.0 – 12.5             | 0.0 – 0.0          | 0.0 – 0.0            |
|                                      | Min - Max   | 0 – 50                 | 0 – 50             | -50 – 25             |
| Psychological well-being (two items) | N (missing) | 28 (1)                 | 27 (2)             | 27 (2)               |
|                                      | Mean (SD)   | 51.79 (19.75)          | 54.63 (14.36)      | 2.78 (18.13)         |
|                                      | [CI]        | [44.13 – 59.45]        | [48.95 – 60.31]    | [-4.39 – 9.95]       |
|                                      | Median      | 50.00                  | 62.50              | 0.00                 |
|                                      | Q1 – Q3     | 50.00 – 62.50          | 50.00 – 62.50      | -12.50 – 12.50       |
|                                      | Min - Max   | 0.0 – 75.00            | 0.0 – 75.0         | -25.0 – 50.0         |
| Treatment satisfaction (three items) | N (missing) | 28 (1)                 | 26 (3)             | 26 (3)               |
|                                      | Mean (SD)   | 61.94 (14.41)          | 67.57 (11.67)      | 5.57 (18.61)         |

|                                 |             |                 |                 |                 |
|---------------------------------|-------------|-----------------|-----------------|-----------------|
|                                 | [CI]        | [56.35 – 67.53] | [62.86 – 72.28] | [-1.95 – 13.09] |
|                                 | Median      | 66.67           | 66.83           | 11.00           |
|                                 | Q1 – Q3     | 55.67 – 67.00   | 66.50 – 77.67   | -11.00 – 22.00  |
|                                 | Min - Max   | 22.00 – 89.00   | 44.33 – 100.00  | -33.33 – 44.67  |
| Treatment preference (one item) | N (missing) | 23 (6)          | 24 (5)          | 20 (9)          |
|                                 | Mean (SD)   | 62.0 (23.7)     | 75.0 (27.6)     | 12.5 (17.2)     |
|                                 | [CI]        | [51.7 – 72.2]   | [63.4 – 86.6]   | [4.4 – 20.6]    |
|                                 | Median      | 50.0            | 75.0            | 0.0             |
|                                 | Q1 – Q3     | 50.0 – 75.0     | 50.0 – 100.0    | 0.0 – 25.0      |
|                                 | Min - Max   | 0 – 100         | 0 – 100         | 0 – 50          |
|                                 | N (missing) | 28 (1)          | 28 (1)          | 28 (1)          |
| Composite score (20 items)      | Mean (SD)   | 39.85 (8.60)    | 42.52 (8.33)    | 2.67 (12.26)    |
|                                 | [CI]        | [36.51 – 43.18] | [39.29 – 45.75] | [-2.0 – 7.42]   |
|                                 | Median      | 39.91           | 42.90           | 3.69            |
|                                 | Q1 – Q3     | 33.83 – 46.32   | 35.69 – 46.58   | -6.77 – 11.54   |
|                                 | Min - Max   | 23.33 – 59.33   | 28.40 – 66.67   | -25.40 – 30.82  |

Supplementary Table 4 Adherence to the SMS service: Time to reaction and percentage of answered requests (for all requests, for FBG and Insulin confirmation), FBG value correctness and compliance to insulin advice

| Parameter                                            | N (missing) | Mean (SD)     | Median | Q1–Q4          | Min - Max      |
|------------------------------------------------------|-------------|---------------|--------|----------------|----------------|
| Median time to patient reaction in minutes           | 29 (0)      | 00:06 (00:06) | 00:03  | 00:02 - 00:08  | 00:01 – 00:20  |
| Median time to patient reaction in minutes (FBG)     | 29 (0)      | 00:06 (00:06) | 00:03  | 00:01 – 00:09  | 00:00 – 00:50  |
| Median time to patient reaction in minutes (Insulin) | 29 (0)      | 00:06 (00:06) | 00:04  | 00:02 – 00:08  | 00:01 – 00:23  |
| SMS with patient reaction in %                       | 29 (0)      | 97.17 (4.85)  | 100.00 | 96.89 – 100.00 | 83.33 – 100.00 |
| SMS with patient reaction in % (FBG)                 | 29 (0)      | 96.37 (7.30)  | 100.00 | 96.55 - 100.00 | 68.57 - 100.00 |
| SMS with patient reaction in % (insulin)             | 29 (0)      | 87.02 (4.85)  | 100.00 | 98.75 - 100.00 | 72.64 - 100.00 |
| Correctness of FBG values in %                       | 29 (0)      | 97.17 (4.85)  | 93.83  | 84.76 – 98.57  | 17.46 – 100.0  |
| Compliance to advised insulin does in %              | 29 (0)      | 97.17 (4.85)  | 98.75  | 90.45 – 100.0  | 54.84 – 100.0  |

Supplementary Table 5 SMS service healthcare professional (HCP) satisfaction questionnaire in the target group: physician

| Item                                                                                                                                                                                                                                           | Parameter | Level           | Total N=9 N (%) [CI]      |
|------------------------------------------------------------------------------------------------------------------------------------------------------------------------------------------------------------------------------------------------|-----------|-----------------|---------------------------|
| To what extent do you agree with the following statements? The RocheDiabetes InsulinStart Service... resulted in a simplification of the workflow for me (e.g. through the presettings of the titration algorithms in the AccuChek Smart Pix). |           | (fully) Agree   | 5 ( 55.6 %) [ 26.7, 81.1] |
|                                                                                                                                                                                                                                                |           | Partially agree | 2 ( 22.2 %) [ 6.3, 54.7]  |
|                                                                                                                                                                                                                                                |           | Disagree        | 1 ( 11.1 %) [ 2.0, 43.5]  |
|                                                                                                                                                                                                                                                |           | No Opinion      | 0 ( 0.0 %) [ 0.0, 29.9]   |
|                                                                                                                                                                                                                                                |           | Missing         | 1 ( 11.1 %) [ 2.0, 43.5]  |
|                                                                                                                                                                                                                                                |           | (fully) Agree   | 6 ( 66.7 %) [ 35.4, 87.9] |

|        |                                                                                                                                                                                                                   |                 |                           |
|--------|-------------------------------------------------------------------------------------------------------------------------------------------------------------------------------------------------------------------|-----------------|---------------------------|
|        | ...resulted in time savings for me (e.g. as less contact with the patient was necessary during the titration).                                                                                                    | Partially agree | 1 ( 11.1 %) [ 2.0, 43.5]  |
|        |                                                                                                                                                                                                                   | Disagree        | 1 ( 11.1 %) [ 2.0, 43.5]  |
|        |                                                                                                                                                                                                                   | No Opinion      | 0 ( 0.0 %) [ 0.0, 29.9]   |
|        |                                                                                                                                                                                                                   | Missing         | 1 ( 11.1 %) [ 2.0, 43.5]  |
|        | ..helped patients presumably reaching their target values faster (compared to their experiences outside the GetFit Study).                                                                                        | (fully) Agree   | 1 ( 11.1 %) [ 2.0, 43.5]  |
|        |                                                                                                                                                                                                                   | Partially agree | 6 ( 66.7 %) [ 35.4, 87.9] |
|        |                                                                                                                                                                                                                   | Disagree        | 1 ( 11.1 %) [ 2.0, 43.5]  |
|        |                                                                                                                                                                                                                   | No Opinion      | 0 ( 0.0 %) [ 0.0, 29.9]   |
|        |                                                                                                                                                                                                                   | Missing         | 1 ( 11.1 %) [ 2.0, 43.5]  |
|        | ... helped patients achieving a safe, hypoglycemia-free titration.                                                                                                                                                | (fully) Agree   | 5 ( 55.6 %) [ 26.7, 81.1] |
|        |                                                                                                                                                                                                                   | Partially agree | 2 ( 22.2 %) [ 6.3, 54.7]  |
|        |                                                                                                                                                                                                                   | Disagree        | 1 ( 11.1 %) [ 2.0, 43.5]  |
|        |                                                                                                                                                                                                                   | No Opinion      | 0 ( 0.0 %) [ 0.0, 29.9]   |
|        |                                                                                                                                                                                                                   | Missing         | 1 ( 11.1 %) [ 2.0, 43.5]  |
|        | ...helped patients achieving an effective start to insulin therapy.                                                                                                                                               | (fully) Agree   | 4 ( 44.4 %) [ 18.9, 73.3] |
|        |                                                                                                                                                                                                                   | Partially agree | 3 ( 33.3 %) [ 12.1, 64.6] |
|        |                                                                                                                                                                                                                   | Disagree        | 1 ( 11.1 %) [ 2.0, 43.5]  |
|        |                                                                                                                                                                                                                   | No Opinion      | 0 ( 0.0 %) [ 0.0, 29.9]   |
|        |                                                                                                                                                                                                                   | Missing         | 1 ( 11.1 %) [ 2.0, 43.5]  |
| Effort | In your opinion, how much effort did it take to explain the RocheDiabetes InsulinStart Service to the patient and to start the service (excluding documentation steps and other training required for the study)? | (fully) Agree   | 1 ( 11.1 %) [ 2.0, 43.5]  |
|        |                                                                                                                                                                                                                   | Partially agree | 6 ( 66.7 %) [ 35.4, 87.9] |
|        |                                                                                                                                                                                                                   | Disagree        | 1 ( 11.1 %) [ 2.0, 43.5]  |
|        |                                                                                                                                                                                                                   | No Opinion      | 0 ( 0.0 %) [ 0.0, 29.9]   |
|        |                                                                                                                                                                                                                   | Missing         | 1 ( 11.1 %) [ 2.0, 43.5]  |

Supplementary Table 6 12 Item Short Form Health Survey (SF-12)

| Parameter                       | Statistic   | Baseline Total<br>N=29 | Visit 4 Total N=29 | Change Total<br>N=29 |
|---------------------------------|-------------|------------------------|--------------------|----------------------|
| Mental health composite score   | N (missing) | 28 (1)                 | 25 (4)             | 25 (4)               |
|                                 | Mean (SD)   | 45.13 (12.32)          | 47.28 (13.83)      | 1.96 (8.30)          |
|                                 | [CI]        | [40.35 – 49.90]        | [41.57 – 52.99]    | [-1.46 – 5.39]       |
|                                 | Median      | 47.54                  | 51.34              | 1.28                 |
|                                 | Q1 – Q3     | 33.62 – 55.82          | 36.83 – 59.53      | -1.52 – 5.21         |
|                                 | Min - Max   | 24.04 – 65.66          | 17.70 – 65.50      | -18.88 – 17.79       |
| Physical health composite score | N (missing) | 28 (1)                 | 25 (4)             | 25 (4)               |
|                                 | Mean (SD)   | 40.34 (11.71)          | 42.50 (13.44)      | 1.17 (8.80)          |
|                                 | [CI]        | [35.80 – 44.88]        | [36.96 – 48.05]    | [-2.47 – 4.80]       |
|                                 | Median      | 40.86                  | 44.22              | 1.24                 |
|                                 | Q1 – Q3     | 30.62 – 51.91          | 31.78 – 54.30      | -3.44 – 3.80         |
|                                 | Min - Max   | 20.26 – 58.10          | 12.20 – 60.07      | -15.74 – 29.09       |
